# Supplementary material
Source: publisher site journal article supplement (https://www.dovepress.com/article/338066)
Supplement: Supplementary file 1 [file get_supplementary_file.php]

# Supplementary Table 1 Univariate Association of with surgery and chemotherapy

|  | | | | | **Surgery** | | | |  |
| --- | --- | --- | --- | --- | --- | --- | --- | --- | --- |
|  | | | | | **___________________________** | | | |  |
| **Chemotherapy** | **Covariate** | **Level** | **No surgery N=71** | **Surgery or ablation N=87** | | **Transplantation  N=12** | **Parametric P-value*** |
| No | Gender | Male | 19 (65.52) | 34 (64.15) | | 2 (66.67) | 0.990 |
| Female | 10 (34.48) | 19 (35.85) | | 1 (33.33) |
|  | Age category | <18 | 1 (3.45) | 12 (22.64) | | 0 (0) | **<.001** |
| 18-39 | 7 (24.14) | 31 (58.49) | | 3 (100) |
| 40-64 | 12 (41.38) | 6 (11.32) | | 0 (0) |
| >65 | 9 (31.03) | 4 (7.55) | | 0 (0) |
|  | Ethnicity | Caucasian | 20 (68.97) | 46 (86.79) | | 2 (66.67) | 0.147 |
| African- American | 5 (17.24) | 6 (11.32) | | 1 (33.33) |
| Other | 4 (13.79) | 1 (1.89) | | 0 (0) |
|  | Year of diagnosis | 2004-2007 | 11 (37.93) | 21 (39.62) | | 1 (33.33) | 0.734 |
| 2008-2011 | 11 (37.93) | 13 (24.53) | | 1 (33.33) |
| 2012-2014 | 7 (24.14) | 19 (35.85) | | 1 (33.33) |
|  | Number of lesions | Single lesion | 15 (51.72) | 42 (79.25) | | 1 (33.33) | **0.013** |
| Multiple lesions | 7 (24.14) | 8 (15.09) | | 2 (66.67) |
| Unknown | 7 (24.14) | 3 (5.66) | | 0 (0) |
|  | Vascular invasion | No | 16 (55.17) | 30 (56.6) | | 1 (33.33) | 0.159 |
| Yes | 7 (24.14) | 20 (37.74) | | 2 (66.67) |
| Unknown | 6 (20.69) | 3 (5.66) | | 0 (0) |
|  | Node stage category | N0 | 22 (75.86) | 43 (81.13) | | 3 (100) | 0.073 |
| N1 | 2 (6.9) | 9 (16.98) | | 0 (0) |
| Nx | 5 (17.24) | 1 (1.89) | | 0 (0) |
|  | Tumor size | ≤5cm | 5 (17.24) | 14 (26.42) | | 0 (0) | **<.001** |
| >5 cm | 13 (44.83) | 38 (71.7) | | 2 (66.67) |
| Unknown | 11 (37.93) | 1 (1.89) | | 1 (33.33) |
|  | Tumor stage category | T1 | 13 (44.83) | 28 (52.83) | | 1 (33.33) | **0.003** |
| T2 | 0 (0) | 14 (26.42) | | 0 (0) |
| T3 | 7 (24.14) | 8 (15.09) | | 1 (33.33) |
| T4 | 2 (6.9) | 3 (5.66) | | 0 (0) |
| Tx | 7 (24.14) | 0 (0) | | 1 (33.33) |
|  | | | | | | | | | |
|  | Differentiation Grade | G1 | 1 (3.45) | 4 (7.55) | | 0 (0) | 0.576 |
| G2 | 5 (17.24) | 19 (35.85) | | 1 (33.33) |
| G3 | 3 (10.34) | 4 (7.55) | | 0 (0) |
| Unknown | 20 (68.97) | 26 (49.06) | | 2 (66.67) |
|  | AFP | Negative | 9 (31.03) | 30 (56.6) | | 2 (66.67) | 0.062 |
| Positive | 13 (44.83) | 9 (16.98) | | 1 (33.33) |
| Other | 7 (24.14) | 14 (26.42) | | 0 (0) |
|  | Insurance status | Uninsured | 1 (3.45) | 1 (1.89) | | 0 (0) | 0.991 |
| Insured | 18 (62.07) | 34 (64.15) | | 2 (66.67) |
| Unknown | 10 (34.48) | 18 (33.96) | | 1 (33.33) |
|  | Age at diagnosis |  | 53.21 ±20.73 | 29.45 ±17.36 | | 26.67 ±8.14 | **<.001** |
|  | Survival months |  | 5.9 ±8.27 | 50.57 ±37.46 | | 22.33 ±18.61 | **<.001** |
| Yes | Gender | Male | 23 (54.76) | 22 (64.71) | | 6 (66.67) | 0.619 |
| Female | 19 (45.24) | 12 (35.29) | | 3 (33.33) |
|  | Age category | <18 | 12 (28.57) | 13 (38.24) | | 4 (44.44) | 0.796 |
| 18-39 | 21 (50) | 12 (35.29) | | 3 (33.33) |
| 40-64 | 6 (14.29) | 6 (17.65) | | 2 (22.22) |
| >65 | 3 (7.14) | 3 (8.82) | | 0 (0) |
|  | Ethnicity | Caucasian | 31 (73.81) | 23 (67.65) | | 9 (100) | 0.215 |
| African-  American | 6 (14.29) | 3 (8.82) | | 0 (0) |
| Other | 5 (11.9) | 8 (23.53) | | 0 (0) |
|  | Year of diagnosis | 2004-2007 | 12 (28.57) | 19 (55.88) | | 3 (33.33) | **0.009** |
| 2008-2011 | 19 (45.24) | 12 (35.29) | | 1 (11.11) |
| 2012-2014 | 11 (26.19) | 3 (8.82) | | 5 (55.56) |
|  | Number of lesions | Single lesion | 20 (47.62) | 19 (55.88) | | 5 (55.56) | 0.574 |
| Multiple lesions | 16 (38.1) | 9 (26.47) | | 4 (44.44) |
| Unknown | 6 (14.29) | 6 (17.65) | | 0 (0) |
|  | Vascular invasion | No | 18 (42.86) | 15 (44.12) | | 2 (22.22) | 0.286 |
| Yes | 18 (42.86) | 13 (38.24) | | 7 (77.78) |
| Unknown | 6 (14.29) | 6 (17.65) | | 0 (0) |
|  | Node stage category | N0 | 19 (45.24) | 15 (44.12) | | 5 (55.56) | 0.177 |
| N1 | 14 (33.33) | 17 (50) | | 4 (44.44) |
| Nx | 9 (21.43) | 2 (5.88) | | 0 (0) |
|  | Tumor size | ≤5cm | 6 (14.29) | 3 (8.82) | | 1 (11.11) | 0.273 |
| >5 cm | 27 (64.29) | 28 (82.35) | | 8 (88.89) |
| Unknown | 9 (21.43) | 3 (8.82) | | 0 (0) |
|  | Tumor stage category | T1 | 14 (33.33) | 13 (38.24) | | 2 (22.22) | 0.246 |
| T2 | 4 (9.52) | 4 (11.76) | | 0 (0) |
| T3 | 14 (33.33) | 10 (29.41) | | 7 (77.78) |
| T4 | 4 (9.52) | 5 (14.71) | | 0 (0) |
| Tx | 6 (14.29) | 2 (5.88) | | 0 (0) |
|  | Differentiation Grade | G1 | 3 (7.14) | 6 (17.65) | | 1 (11.11) | **0.025** |
| G2 | 3 (7.14) | 7 (20.59) | | 4 (44.44) |
| G3 | 4 (9.52) | 6 (17.65) | | 0 (0) |
| Unknown | 32 (76.19) | 15 (44.12) | | 4 (44.44) |
|  | AFP | Negative | 19 (45.24) | 14 (41.18) | | 4 (44.44) | 0.316 |
| Positive | 17 (40.48) | 9 (26.47) | | 4 (44.44) |
| Other | 6 (14.29) | 11 (32.35) | | 1 (11.11) |
|  | Insurance status | Uninsured | 1 (2.38) | 0 (0) | | 0 (0) | 0.271 |
| Insured | 35 (83.33) | 23 (67.65) | | 8 (88.89) |
| Unknown | 6 (14.29) | 11 (32.35) | | 1 (11.11) |
|  | Age at diagnosis |  | 29.55± | 28.97± | | 27.44 ± | 0.953 |
|  | 18.79 | 18.6 | | 17.83 |
|  | Survival months |  | 20.38 ± | 49.68 ± | | 31.78 ± | **<.001** |
|  | 26.06 | 29.62 | | 23.74 |
| *  The parametric p-value is calculated by ANOVA for numerical covariates and chi-square test for categorical covariates. All data presented as N (Col %) or Mean ± SD. P-value is printed in bold when under the 0.05 threshold. | | | | | | | | | |

# Supplementary Table 2 Univariate Association of distant metastases with AFP

|  | | | **AFP** | | |  |
| --- | --- | --- | --- | --- | --- | --- |
|  | | | **___________________________** | | |  |
| **Covariate** | **Level** | **Negative N=78** | **Positive N=53** | **Unknown N=39** | **P-value*** |
| Distant metastasis | No | 53 (67.95) | 34 (64.15) | 26 (66.67) | 0.662 |
| Yes | 24 (30.77) | 16 (30.19) | 11 (28.21) |
| Unknown | 1 (1.28) | 3 (5.66) | 2 (5.13) |
| * The p-value is calculated by Fisher's exact test for categorical covariates. Data presented as N (Col %) . | | | | | | |

| Supplementary Table 3. Backward Cox Proportional Hazards Regression Analysisa | | | | | |
| --- | --- | --- | --- | --- | --- |
|  |  | Cox Proportional Hazards Regression Analysis with OS *,** | | |
|  |  | HR | 95% CI | P value |
| *Age at diagnosis* |  |  |  | **<0.001** |
| <18 |  | 0.15 | 0.06-0.35 | **<0.001** |
| 18-39 |  | 0.30 | 0.14- 0.64 | **0.002** |
| 40-64 |  | 0.64 | 0.30-1.38 | 0.254 |
| >65 |  | Ref. | - | - |
| *Tumor stage* |  |  |  | **0.002** |
| T1 |  | 0.60 | 0.29-1.23 | 0.160 |
| T2 |  | 0.31 | 0.11-0.87 | **0.026** |
| T3 |  | 1.35 | 0.64-2.84 | 0.434 |
| T4 |  | 1.48 | 0.63-3.48 | 0.370 |
| Tx |  | Ref | - | - |
| *Differentiation grade* |  |  |  | **0.003** |
| G1 |  | 0.39 | 0.16-0.98 | **0.045** |
| G2 |  | 0.63 | 0.34-1.19 | 0.153 |
| G3 |  | 2.45 | 1.20-5.01 | **0.014** |
| Unknown |  | Ref | - | **-** |
| *Distant metastasis* |  |  |  | **<0.001** |
| No |  | 1.47 | 0.52-4.20 | 0.470 |
| Yes |  | 3.64 | 1.20-11.00 | **0.022** |
| Unknown |  | Ref | - | **-** |
| *Surgery or ablation* |  |  |  | **<0.001** |
| No surgery or ablation |  | 4.64 | 1.40-15.37 | **0.012** |
| Liver resection or ablation |  | 1.15 | 0.34-3.95 | 0.823 |
| Liver transplantation |  | Ref | - | **-** |
| aUnknown data on distant metastasis were excluded (n=6) | | | | | |
| * Number of observations in the original data set = 170. Number of observations used = 170.  ** Backward selection with an alpha level of removal of .01 was used. The following variables were removed from the model: AFP, Vascular invasion, sex, size, and tumor number.  P-value is printed in bold when under the 0.05 threshold. | | | | | |
